# Supplementary material for: Poly(ethyleneimine)-exfoliated g-C3N4 nanosheets implanted in alginate beads and their application towards adsorptive desulfurization
Source: Royal Society of Chemistry journal article supplement (doi:10.1039/d4ma01020e), 2024-12-11
Supplement: d4ma01020e1.pdf [file d4ma01020e1.pdf]

## Poly(ethyleneimine)-exfoliated g-C<sub>3</sub>N<sub>4</sub> nanosheets implanted in alginate beads

### and its application towards adsorptive desulfurization

M. Christina Nilavu, A<sup>a</sup>. Santhana Krishna Kumar <sup>\*b</sup>, Himanshu Aggarwal <sup>\*a</sup>, N. Rajesh<sup>\*a</sup>

<sup>a</sup>Department of Chemistry, Birla Institute of Technology and Science-Pilani, Hyderabad Campus, Jawahar Nagar, Hyderabad 500078, India.

<sup>b</sup>Department of Chemistry, National Sun Yat-sen University, No. 70, Lien-hai Road, Gushan District, Kaohsiung 80424, Taiwan

\*Corresponding Authors:

N.Rajesh [nrajesh@hyderabad.bits-pilani.ac.in](mailto:nrajesh@hyderabad.bits-pilani.ac.in), Himanshu Aggarwal:

[himanshu.aggarwal@hyderabad.bits-pilani.ac.in](mailto:himanshu.aggarwal@hyderabad.bits-pilani.ac.in), A.Santhana Krishna Kumar:

[krishnakumar@mail.nsysu.edu.tw](mailto:krishnakumar@mail.nsysu.edu.tw)

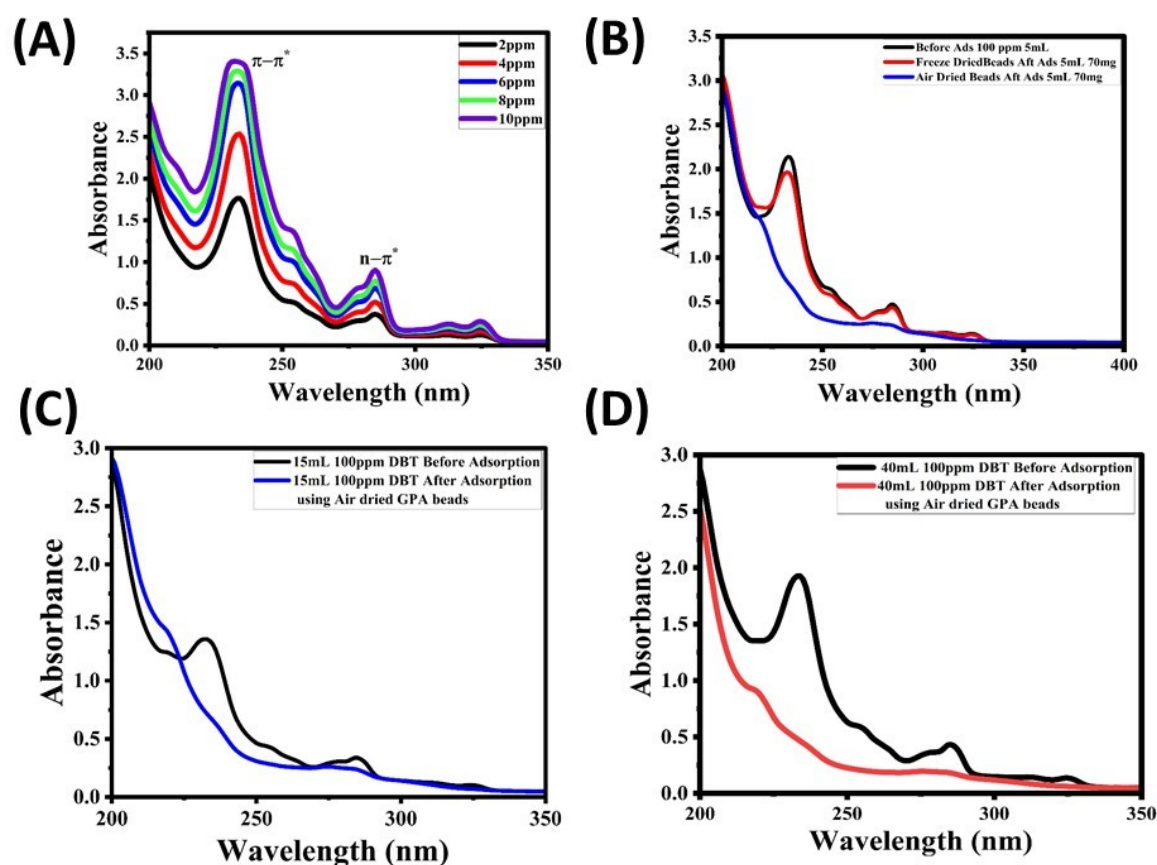

Figure S1. (A) Absorption spectrum for DBT, (B, C and D) Absorbance of DBT before

and after adsorption at varying concentrations conditions in the presence of the as-prepared adsorbent of PEI exfoliated  $g\text{-C}_3\text{N}_4\text{NSs@Cal-Alg}$  alginate beads.

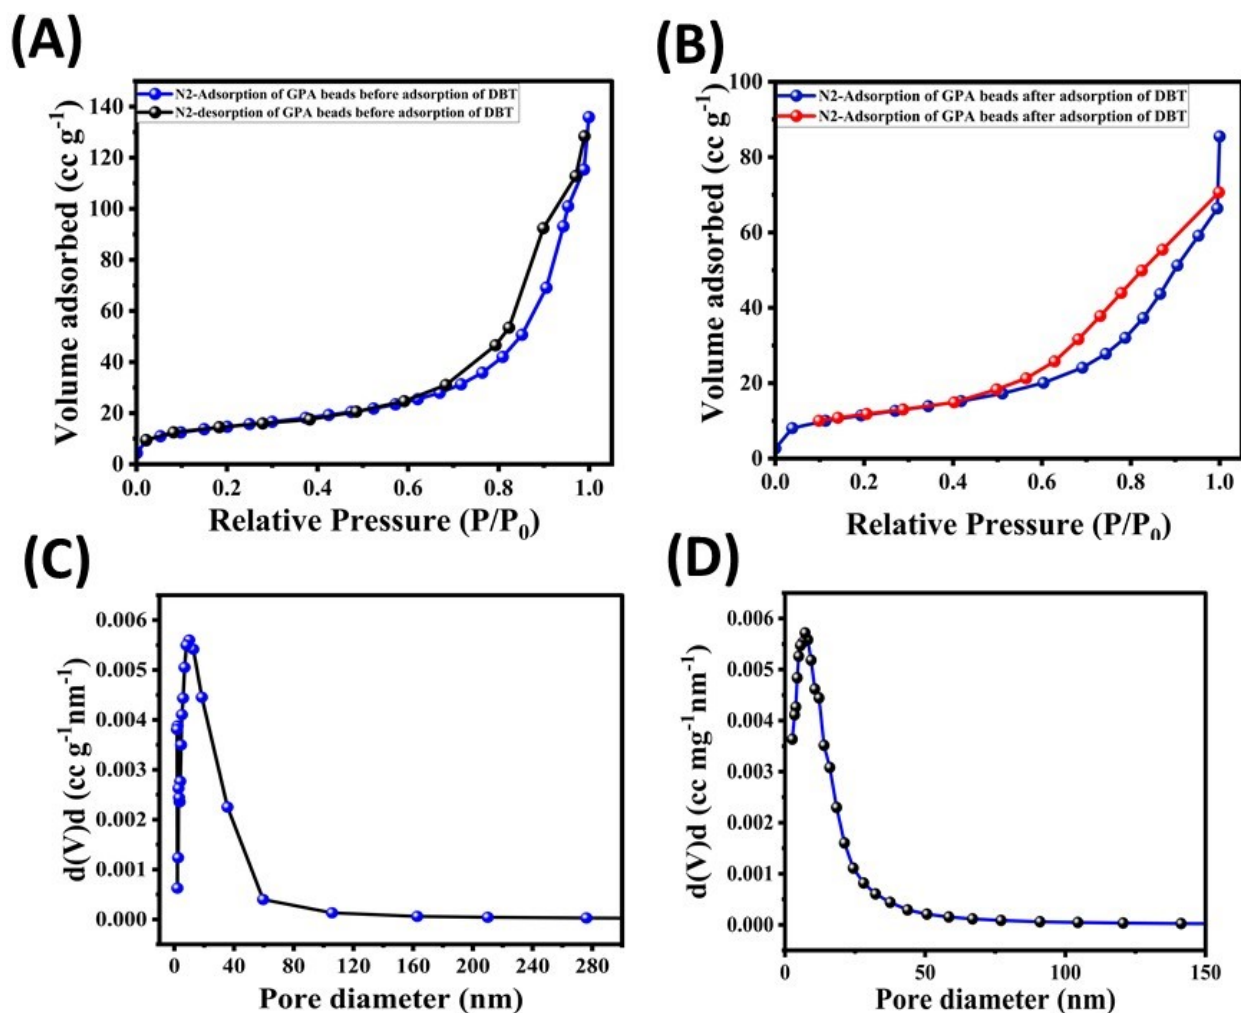

**Figure S2.** The as-developed adsorbent of PEI-exfoliated  $g\text{-C}_3\text{N}_4\text{NSs@Cal-Alg}$  beads for N<sub>2</sub> adsorption-desorption isotherm (A and B) before and after adsorption of DBT; (C and D) BJH pore volume plot for before and after adsorption of DBT.

**Figure S3.** Field Emission Scanning Electron Microscopic (FE-SEM) images of the as-developed Ca-alginate beads functionalized with PEI-g-C<sub>3</sub>N<sub>4</sub> NSs (PEI exfoliated g-C<sub>3</sub>N<sub>4</sub>NSs@alginate beads), **(A and B)** air dried Ca-Alg alginate beads, **(C and D)** Freeze dried Ca-alginate beads, **(E and F)** air dried alginate beads after adsorption of DBT, **(G)** EDX spectra and elemental composition of the as-developed Ca-alginate beads functionalized with PEI-g-C<sub>3</sub>N<sub>4</sub> NSs (PEI exfoliated g-C<sub>3</sub>N<sub>4</sub>NSs@alginate beads) after adsorption of DBT.

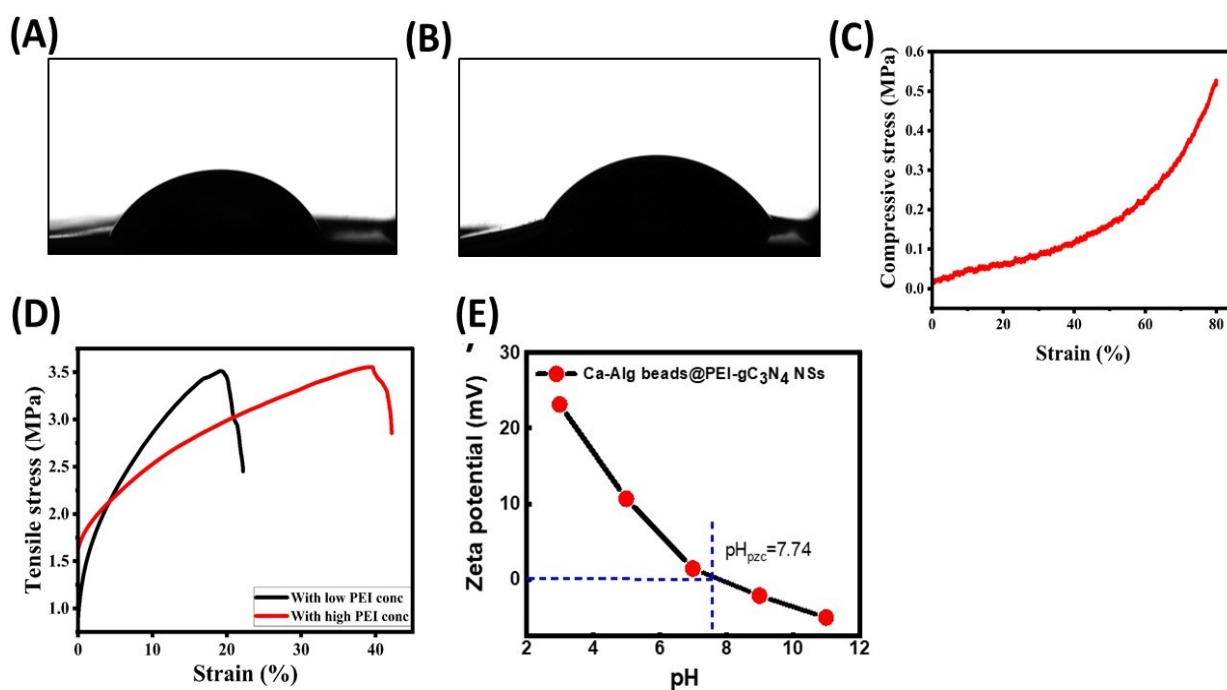

**Figure S4.** Contact angle images for calcium alginate beads (Ca-Alg beads) functionalized with PEI- g-C<sub>3</sub>N<sub>4</sub> NSs for **(A)** before and **(B)** after adsorption of DBT; **(C)** compressive stress-strain curves for PEI-g-C<sub>3</sub>N<sub>4</sub> NSs; **(D)** Tensile stress-strain curves for calcium alginate beads (Ca-Alg beads) functionalized with PEI- g-C<sub>3</sub>N<sub>4</sub> NSs **(D)** with less concentration of PEI 5% **(D, black line)**; a high concentration of PEI 15% concentration **(D, red line)**; **(E)** Point of Zero Charge (pH<sub>pzc</sub>) measurements of calcium alginate beads (Ca-Alg beads) functionalized with PEI- g-C<sub>3</sub>N<sub>4</sub> NSs.

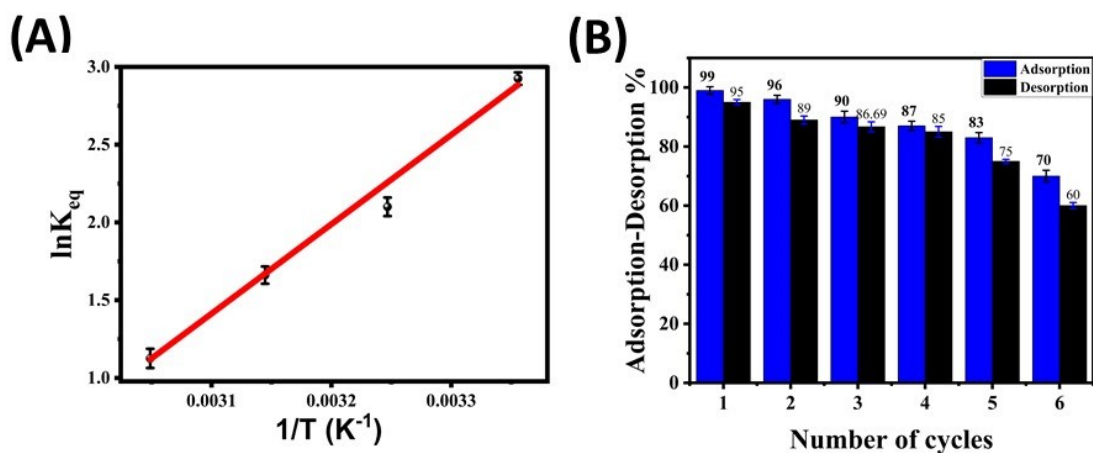

**Figure S5. (A and B)** The as-developed adsorbent of calcium alginate beads (Ca-Alg beads) functionalized with PEI-g-C<sub>3</sub>N<sub>4</sub> NSs for thermodynamic adsorption using Van't Hoff plot for adsorption of DBT (A); Regeneration cycles for adsorption-desorption of DBT (B).

**Table S1** BET-N<sub>2</sub> isotherm data for g-C<sub>3</sub>N<sub>4</sub>-PEI NSs@Cal-Alginate beads

| No. | Type of material                                                                     | Surface area<br>m <sup>2</sup> g <sup>-1</sup> | Pore diameter<br>(nm) | Pore volume<br>cm <sup>3</sup> g <sup>-1</sup> | Volume of N <sub>2</sub> uptake in BET<br>ccg <sup>-1</sup> |
|-----|--------------------------------------------------------------------------------------|------------------------------------------------|-----------------------|------------------------------------------------|-------------------------------------------------------------|
| 1   | g-C <sub>3</sub> N <sub>4</sub> -PEI NSs@Cal-Alginate beads <b>Before Adsorption</b> | 142.06                                         | 13.80                 | 0.182                                          | 135                                                         |
| 2   | g-C <sub>3</sub> N <sub>4</sub> -PEI NSs@Cal-Alginate beads <b>After Adsorption</b>  | 35.19                                          | 11.08                 | 0.097                                          | 83                                                          |

**Table S2 Isotherm Parameters**

| Model of Isotherm | Non-linear equation                 | Type of adsorbent                                          | Parameters                                                                                                             | Values                                  |
|-------------------|-------------------------------------|------------------------------------------------------------|------------------------------------------------------------------------------------------------------------------------|-----------------------------------------|
| Langmuir          | $q_e = \frac{q_m b C_e}{1 + b C_e}$ | PEI-g-C <sub>3</sub> N <sub>4</sub> -NSs                   | <b>q<sub>max</sub> (mg g<sup>-1</sup>)</b><br>K <sub>L</sub> (L mg <sup>-1</sup> )<br>R <sub>L</sub><br>R <sup>2</sup> | <b>107.17</b><br>0.05<br>0.166<br>0.98  |
|                   |                                     | PEI-g-C <sub>3</sub> N <sub>4</sub><br>NSs@Ca-Alg<br>beads | <b>q<sub>max</sub></b><br>K <sub>L</sub> (L mg <sup>-1</sup> )<br>R <sub>L</sub><br>R <sup>2</sup>                     | <b>183.03</b><br>0.011<br>0.476<br>0.98 |
| Freundlich        | $q_e = K_F C_e^{1/n}$               | PEI-g-C <sub>3</sub> N <sub>4</sub> -NSs                   | K <sub>F</sub> (mg <sup>1-1/n</sup> g <sup>-1</sup> L <sup>1/n</sup> )<br>n<br>R <sup>2</sup>                          | 6.62<br>1.66<br>0.89                    |
|                   |                                     | PEI-g-C <sub>3</sub> N <sub>4</sub><br>NSs@Ca-Alg<br>beads | K <sub>F</sub> (mg <sup>1-1/n</sup> g <sup>-1</sup> L <sup>1/n</sup> )<br>n<br>R <sup>2</sup>                          | 2.19<br>1.34<br>0.95                    |
| Temkin            | $q_e = \frac{RT}{b} \ln A C_e$      | PEI-g-C <sub>3</sub> N <sub>4</sub> -NSs                   | b <sub>T</sub> (J mol <sup>-1</sup> )<br>K <sub>T</sub> (L g <sup>-1</sup> )<br>R <sup>2</sup>                         | 25.53<br>5.44x10 <sup>-2</sup><br>0.96  |
|                   |                                     | PEI-g-C <sub>3</sub> N <sub>4</sub><br>NSs@Ca-Alg<br>beads | b <sub>T</sub> (J mol <sup>-1</sup> )<br>K <sub>T</sub> (L g <sup>-1</sup> )<br>R <sup>2</sup>                         | 28.51<br>4.35x10 <sup>-2</sup><br>0.91  |

**Table S3 Kinetic and rate parameters**

| <b>Kinetic models</b>    | <b>Parameters</b>                                 | <b>Values</b> |
|--------------------------|---------------------------------------------------|---------------|
| Pseudo-first order       | $q_e$ (mg g <sup>-1</sup> )                       | 42.02         |
|                          | $k_1$ (min <sup>-1</sup> )                        | 0.01          |
|                          | $R^2$                                             | 0.981         |
| Pseudo-second order      | $q_e$ (mg g <sup>-1</sup> )                       | 58.16         |
|                          | $k_2$ (min <sup>-1</sup> )                        | 0.001         |
|                          | $R^2$                                             | 0.987         |
| Intra-particle diffusion | $C_1$ (mg g <sup>-1</sup> )                       | -0.49         |
|                          | $K_{i1}$ (mg g <sup>-1</sup> min <sup>1/2</sup> ) | 3.68          |
|                          | $R^2$                                             | 0.99          |
|                          | $C_2$ (mg g <sup>-1</sup> )                       | 1.21          |
|                          | $K_{i2}$ (mg g <sup>-1</sup> min <sup>1/2</sup> ) | 2.74          |
|                          | $R^2$                                             | 0.98          |
|                          | $C_3$ (mg g <sup>-1</sup> )                       | 10.39         |
|                          | $K_{i3}$ (mg g <sup>-1</sup> min <sup>1/2</sup> ) | 2.14          |
|                          | $R^2$                                             | 0.99          |

| Temperature<br>(Kelvin) | $\Delta G^\circ$<br>(kJ mol <sup>-1</sup> ) | $\Delta H^\circ$<br>(kJ mol <sup>-1</sup> ) | $\Delta S^\circ$<br>(kJ mol <sup>-1</sup> K <sup>-1</sup> ) | $R^2$ |
|-------------------------|---------------------------------------------|---------------------------------------------|-------------------------------------------------------------|-------|
|-------------------------|---------------------------------------------|---------------------------------------------|-------------------------------------------------------------|-------|

|            |        |         |         |       |
|------------|--------|---------|---------|-------|
|            |        |         | )       |       |
| <b>298</b> | -7.562 | -47.797 | -0.1364 | 0.991 |
| <b>308</b> | -5.561 |         |         |       |
| <b>318</b> | -4.392 |         |         |       |
| <b>328</b> | -3.070 |         |         |       |

**Table  
S4  
Therm  
odyna**

**mic parameters**

**Table S5 Fixed based column adsorptive desulfurization data**

| <b>Models</b>     | <b>Parameters</b>                                 | <b>Values</b> |
|-------------------|---------------------------------------------------|---------------|
| Thomas model      | $q_o$ (mg g <sup>-1</sup> )                       | 132.8         |
|                   | $K_{Th}$ (mL min <sup>-1</sup> mg <sup>-1</sup> ) | 0.054         |
|                   | $R^2$                                             | 0.947         |
| Yoon-Nelson model | $K_{yn}$ (min <sup>-1</sup> )                     | 0.0534        |
|                   | $\tau$ (min)                                      | 135           |
|                   | $R^2$                                             | 0.932         |
